# Supplementary material for: SARS‐CoV‐2 triggers complement activation through interactions with heparan sulfate
Source: PubMed Central journal article supplement — Clin Transl Immunology. 2022 Aug 18;11(8):e1413. doi: 10.1002/cti2.1413 (PMC9387400; doi:10.1002/cti2.1413), 2022-08-18
Supplement: CTI2-11-e1413-s001.pdf [file CTI2-11-e1413-s001.pdf]

## SUPPLEMENTARY MATERIAL

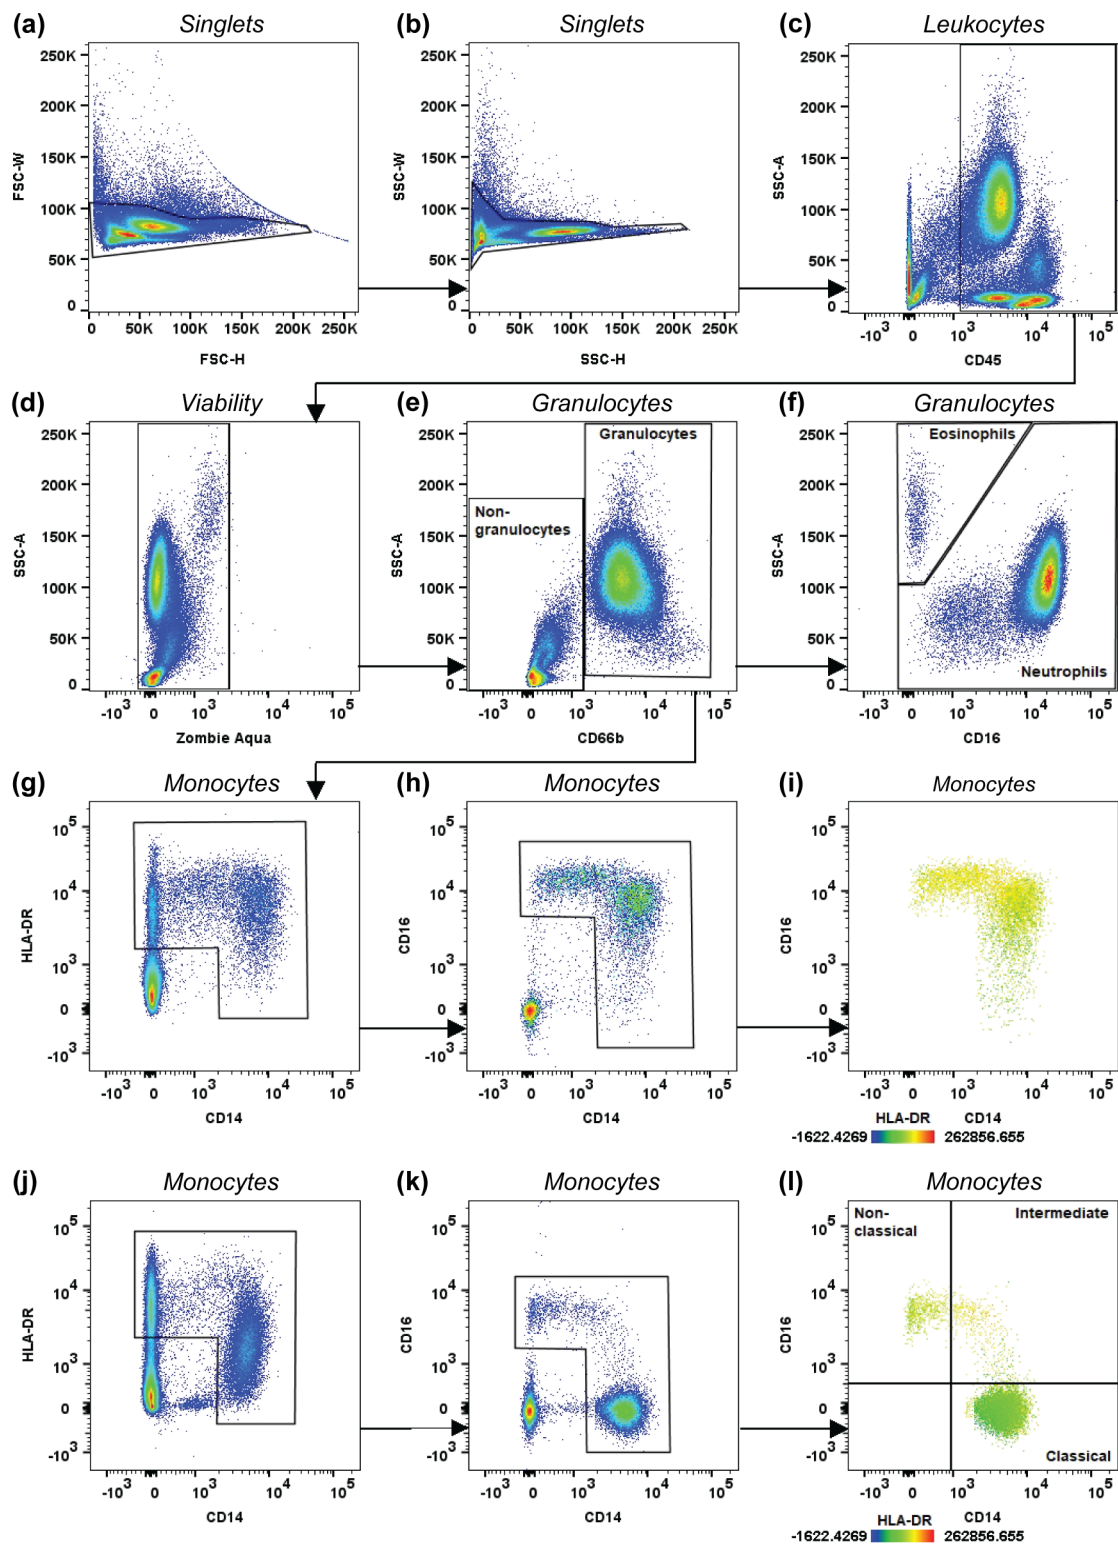

**Supplementary figure 1.** Flow cytometry gating strategy. **(a–i)** Representative plots of SARS-CoV-2 inoculated whole blood stained with fluorophore-antibodies and a viability dye for flow cytometry. **(j–l)** For comparison, representative plots of virus-naïve whole blood stained in the same fashion are also provided for the monocyte gates. All samples had > 95% leukocyte viability.

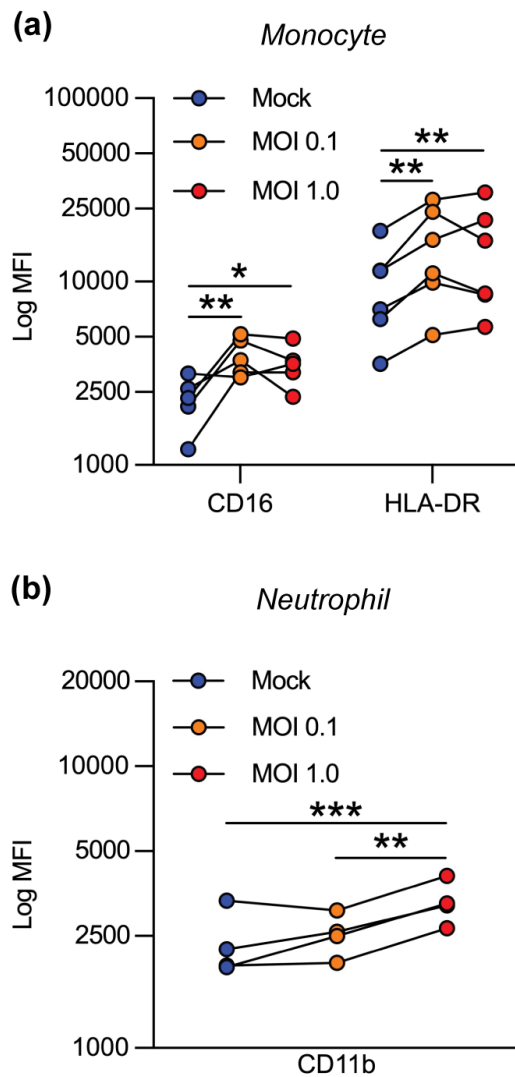

**Supplementary figure 2.** Upregulation of **(a)** CD16 and HLA-DR on monocytes and **(b)** CD11b on neutrophils exposed to SARS-CoV-2. SARS-CoV-2 inoculated lepirudin-anticoagulated whole blood was analysed with flow cytometry at 24 (n = 6) and 3 hours post-inoculation (n = 4) respectively. Surface markers were quantified as MFI. MOI = multiplicity of infection; MFI = median fluorescence intensity; \*  $P < 0.05$ , \*\*  $P < 0.01$ , \*\*\*  $P < 0.001$  using a one-way ANOVA.

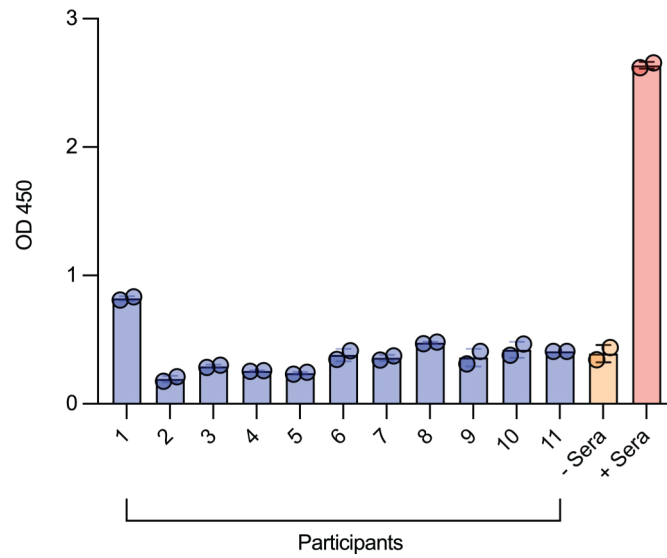

**Supplementary figure 3.** SARS-CoV-2 serology testing of plasma from whole blood used for C5a ELISA studies. Pre-COVID-19 serum (- Sera; i.e. serum negative for SARS-CoV-2) was used as a negative control and a biological standard NIBSC 20/130 (+ Sera) was used as a positive control. The data here are from samples diluted at 1:10. OD 450 = optical density at the wavelength of 450 nm.

| C5a ELISA 30min   |                        | C5a ELISA 24h      |                    | C5a ELISA Pathways |                    |
|-------------------|------------------------|--------------------|--------------------|--------------------|--------------------|
| <i>Sex</i>        | <i>Age<br/>(Years)</i> | <i>Sex</i>         | <i>Age (Years)</i> | <i>Sex</i>         | <i>Age (Years)</i> |
| Male              | 30                     | Male               | 40                 | Female             | 20                 |
| Male              | 23                     | Male               | 26                 | Female             | 20                 |
| Female            | 21                     | Male               | 36                 | Male               | 31                 |
|                   |                        |                    |                    | Male               | 27                 |
|                   |                        |                    |                    | Female             | 57                 |
| Flow Cytometry 3h |                        | Flow Cytometry 24h |                    |                    |                    |
| <i>Sex</i>        | <i>Age<br/>(Years)</i> | <i>Sex</i>         | <i>Age (Years)</i> |                    |                    |
| Male              | 36                     | Male               | 32                 |                    |                    |
| Male              | 41                     | Male               | 24                 |                    |                    |
| Male              | 25                     | Male               | 30                 |                    |                    |
| Female            | 26                     | Female             | 19                 |                    |                    |
|                   |                        | Male               | 23                 |                    |                    |
|                   |                        | Female             | 25                 |                    |                    |

**Supplementary table 1. Research Participants for this Study.** Participants were recruited from the local Brisbane area and had no history of COVID-19, no history of acute illness or vaccination in the last 2 weeks, no immunodeficiencies or autoinflammatory/autoimmune conditions, and were not on any immunomodulatory medications (e.g. corticosteroids). No significant sex or age differences were found between the cohorts at different time points for the ELISA and flow cytometry experiments.
